# Supplementary material for: CD8+ T cells promote proliferation of benign prostatic hyperplasia epithelial cells under low androgen level via modulation of CCL5/STAT5/CCND1 signaling pathway
Source: PubMed Central journal article supplement (PMC5316951; doi:10.1038/srep42893), 2017-02-20

**CD8+T cells promote proliferation of benign prostatic hyperplasia epithelial cells under low androgen level via modulation of CCL5/STAT5/CCND1 signaling pathway**

*Yang Yang, Shuai Hu, Jie Liu, Yun Cui, Yu Fan, Tianjing Lv, Libo Liu, Jun Li, Qun He, Wenke Han, Wei Yu, Yin Sun, and Jie Jin\**

**Supplementary Figure 1**

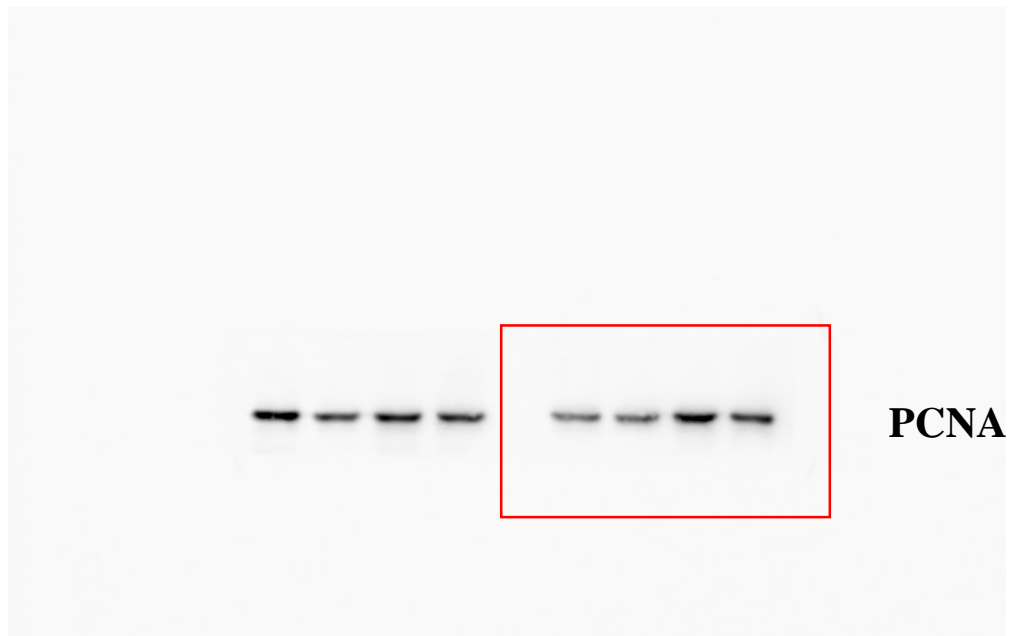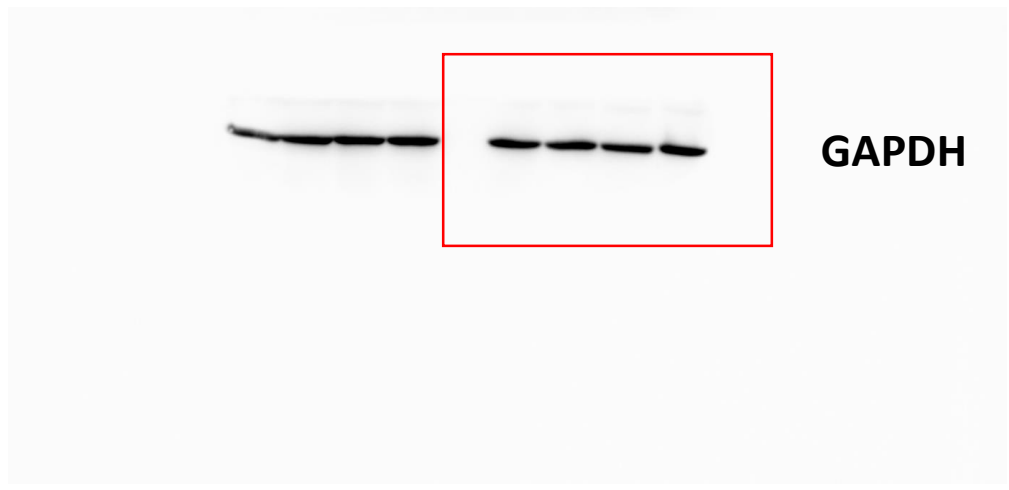

# Supplementary Figure 2

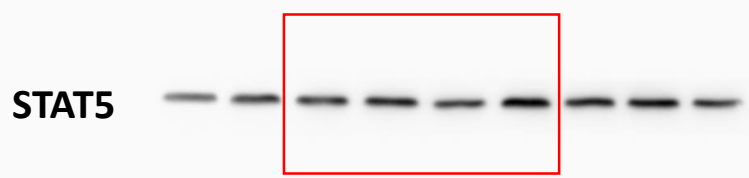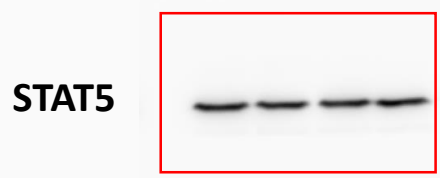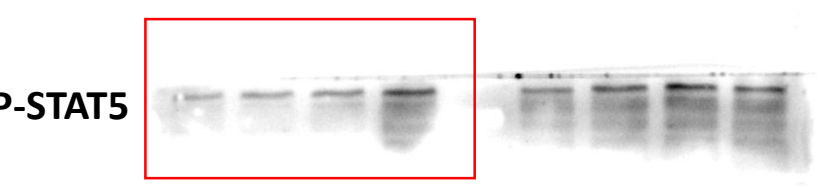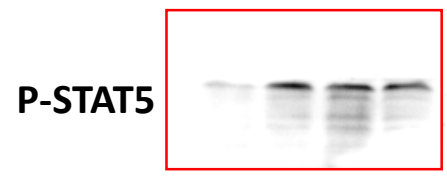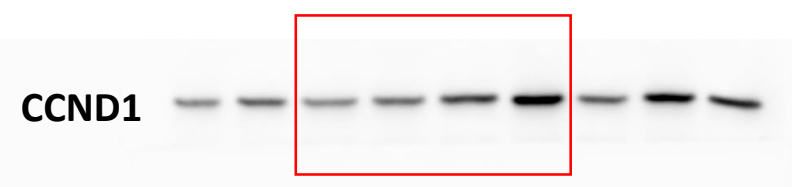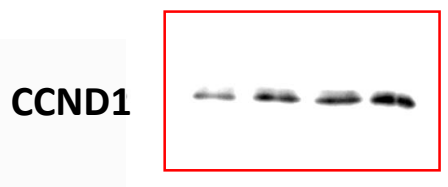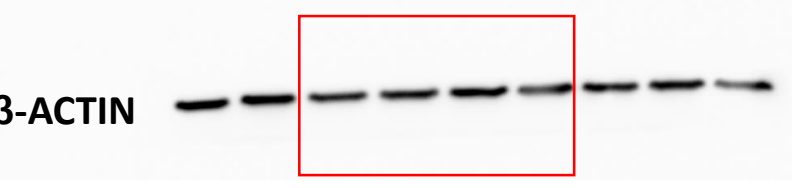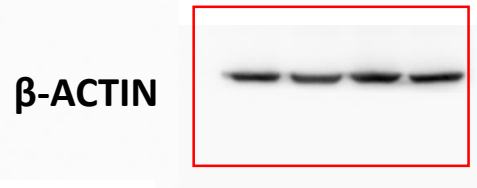

# Supplementary Figure 3

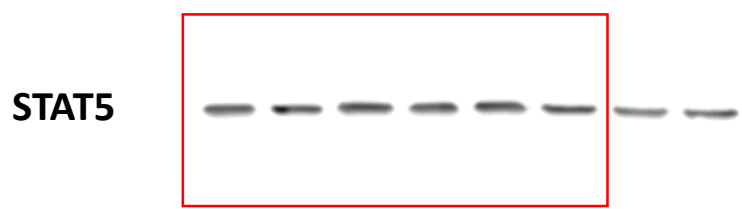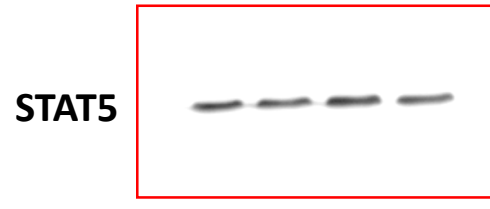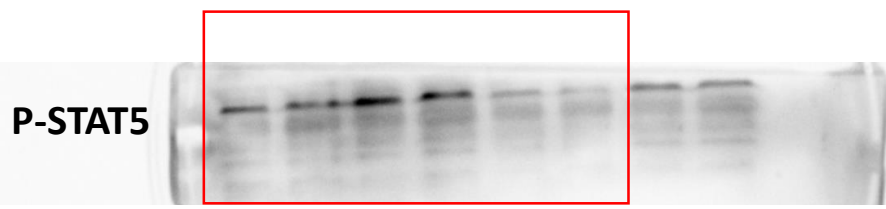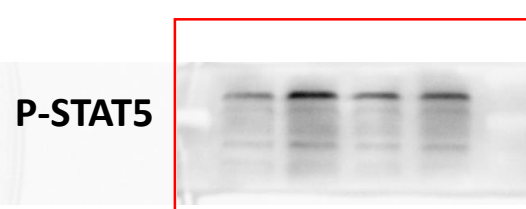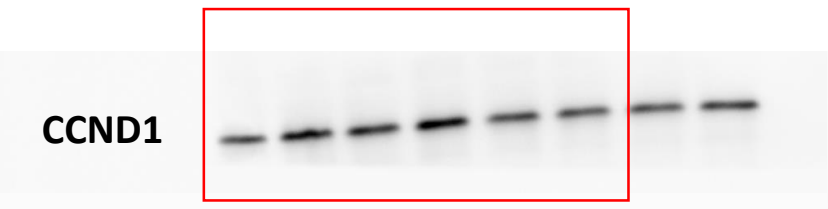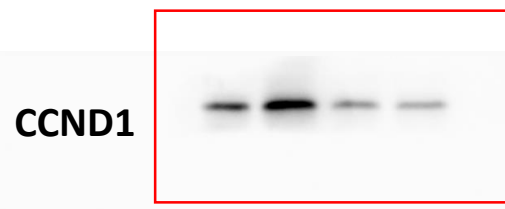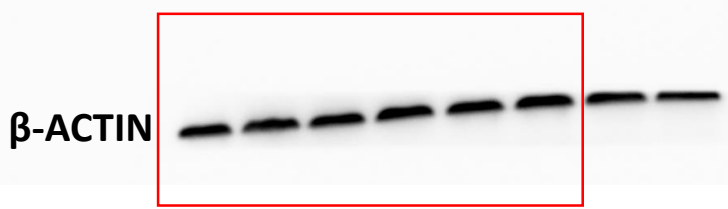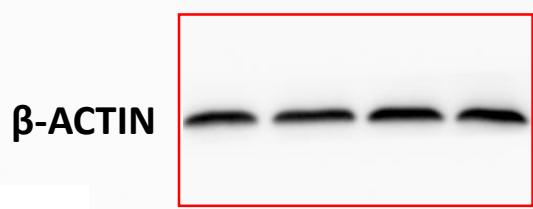

Supplement: srep42893-s1.pdf [file srep42893-s1.pdf]
